# Supplementary material for: Diagnosing uncertainties in global biomass burning emission inventories and their impact on modeled air pollutants
Source: Copernicus journal article supplement (doi:10.5194/egusphere-2023-1822), 2023-10-05
Supplement: Supplementary file 1 [file egusphere-2023-1822-supplement.pdf]

*Supplement of*

**Diagnosing uncertainties in global biomass burning emission inventories and their impact on modeled air pollutants**

Wenxuan Hua<sup>1,2</sup>, Sijia Lou<sup>1,2,3\*</sup>, Xin Huang<sup>1,2,3</sup>, Lian Xue<sup>1,2,3</sup>, Ke Ding<sup>1,2,3</sup>, Zilin Wang<sup>1,2</sup>, Aijun Ding<sup>1,2,3</sup>

<sup>1</sup> Joint International Research Laboratory of Atmospheric and Earth System Sciences, School of Atmospheric Sciences, Nanjing University, Nanjing 210023, China.

<sup>2</sup> Jiangsu Provincial Collaborative Innovation Center for Climate Change, Nanjing, China.

<sup>3</sup> Frontiers Science Center for Critical Earth Material Cycling, Nanjing University, Nanjing, China.

Corresponding author: Sijia Lou ([lousijia@nju.edu.cn](mailto:lousijia@nju.edu.cn))

|           | LCT                            | FINN1.5          | GFED4s                                       | QFED2.5              | VFE10             |
|-----------|--------------------------------|------------------|----------------------------------------------|----------------------|-------------------|
| Tropical  | Evergreen Broadleaf Forest     | Tropical forest  | Tropical forest                              | Tropical forest      | Tropical forest   |
|           | Closed Shrublands              | Tropical forest  | Tropical forest                              | Tropical forest      | Tropical savanna  |
|           | Open Shrublands                | Savanna          | Savanna                                      | Savanna              | Tropical savanna  |
|           | Woody Savanna                  | Tropical forest  | Tropical forest                              | Tropical forest      | Tropical savanna  |
|           | Savanna                        | Savanna          | Savanna                                      | Savanna              | Tropical savanna  |
| Temperate | Evergreen Needleleaf Forest    | Boreal forest    | Extratropical forest(50-70° N Boreal forest) | Extratropical forest | Temperate forest  |
|           | Evergreen Broadleaf Forest     | Tropical forest  | Temperate forest                             | Temperate forest     | Temperate forest  |
|           | Deciduous Needleleaf Forest    | Boreal forest    | Extratropical forest(50-70° N Boreal forest) | Extratropical forest | Temperate forest  |
|           | Deciduous Broadleaf Forest     | Temperate forest | Extratropical forest(50-70° N Boreal forest) | Extratropical forest | Temperate forest  |
|           | Mixed Forest                   | Temperate forest | Extratropical forest(50-70° N Boreal forest) | Extratropical forest | Temperate forest  |
|           | Closed Shrublands              | Temperate forest | Extratropical forest(50-70° N Boreal forest) | Extratropical forest | Temperate savanna |
|           | Open Shrublands                | Savanna          | Savanna                                      | Savanna              | Temperate savanna |
|           | Woody Savanna                  | Temperate forest | Extratropical forest(50-70° N Boreal forest) | Extratropical forest | Temperate savanna |
| Boreal    | Savanna                        | Savanna          | Savanna                                      | Savanna              | Temperate savanna |
|           | Evergreen Needleleaf Forest    | Boreal forest    | Extratropical forest(50-70° N Boreal forest) | Extratropical forest | Boreal forest     |
|           | Deciduous Needleleaf Forest    | Boreal forest    | Extratropical forest(50-70° N Boreal forest) | Extratropical forest | Boreal forest     |
|           | Mixed Forest                   | Temperate forest | Extratropical forest(50-70° N Boreal forest) | Extratropical forest | Boreal forest     |
|           | Closed Shrublands              | Boreal forest    | Extratropical forest(50-70° N Boreal forest) | Extratropical forest | Boreal savanna    |
|           | Open Shrublands                | Savanna          | Savanna                                      | Savanna              | Boreal savanna    |
|           | Woody Savanna                  | Boreal forest    | Extratropical forest                         | Extratropical forest | Boreal savanna    |
| Other     | Savanna                        | Savanna          | Savanna                                      | Savanna              | Boreal savanna    |
|           | Grass                          | Savanna          | Grass                                        | Grass                | Grass             |
|           | Urban and Built-Up             | bare             | Grass                                        | Grass                | Grass             |
|           | Crops                          | Crop             | Crop                                         | Grass                | Crop              |
|           | Crop/Natural Vegetation Mosaic | Grass            | Crop                                         | Grass                | Crop              |
|           | Permanent Wetlands             | Grass            | Peatland                                     | Grass                | Peatland          |
|           | Snow and Ice                   | bare             | Grass                                        | Grass                | Desertic areas    |
|           | Barren or Sparsely Vegetated   | Grass            | Grass                                        | Grass                | Desertic areas    |

|                      |
|----------------------|
| Tropical forest      |
| Temperate forest     |
| Boreal forest        |
| Extratropical forest |
| Savanna and Grass    |
| Crop                 |
| Peatland             |

Figure S1. LULC classifications and seven generic land cover classes as assigned by four BB datasets.

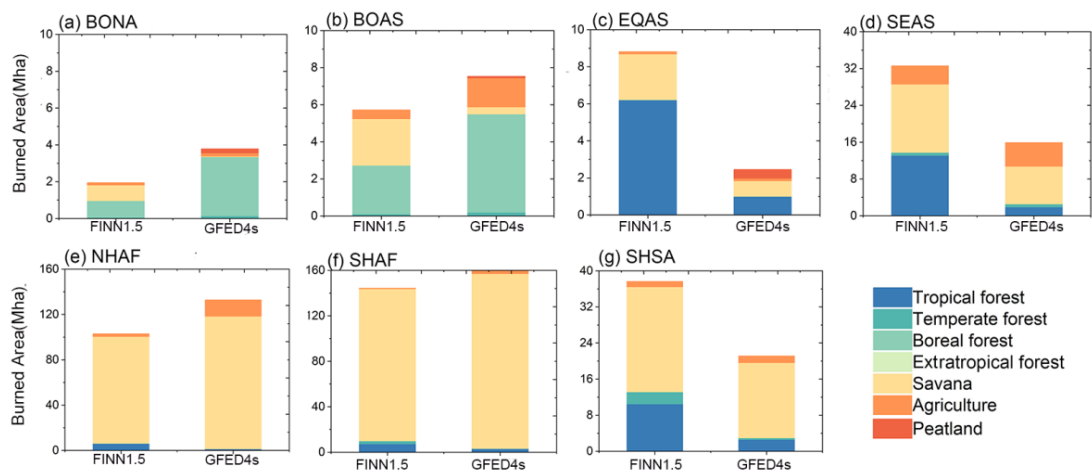

Figure S2. Burned area of two bottom-up datasets (namely FINN1.5 and GFED4s) across seven regions during 2013-2016.

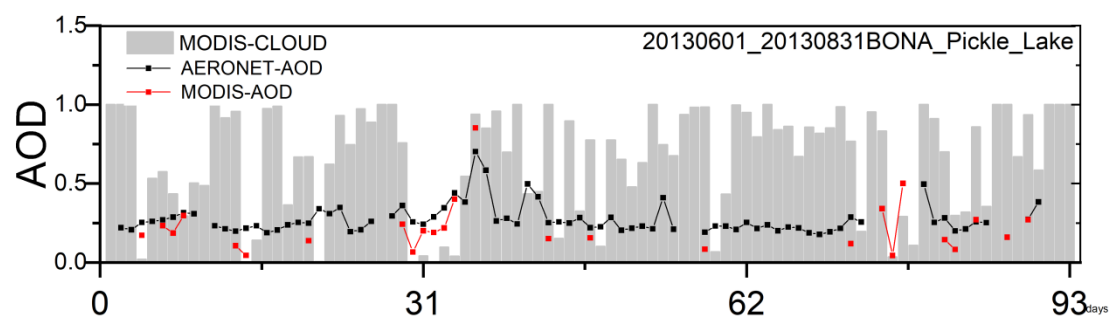

Figure S3. The time series of MODIS AOD, MODIS cloud fractions and AERONET ground-based observations during the combustion at Pickle Lake station in BONA. It shows that there are more missing detections in MODIS (red dots), which directly demonstrates that clouds will block the observations of MODIS.

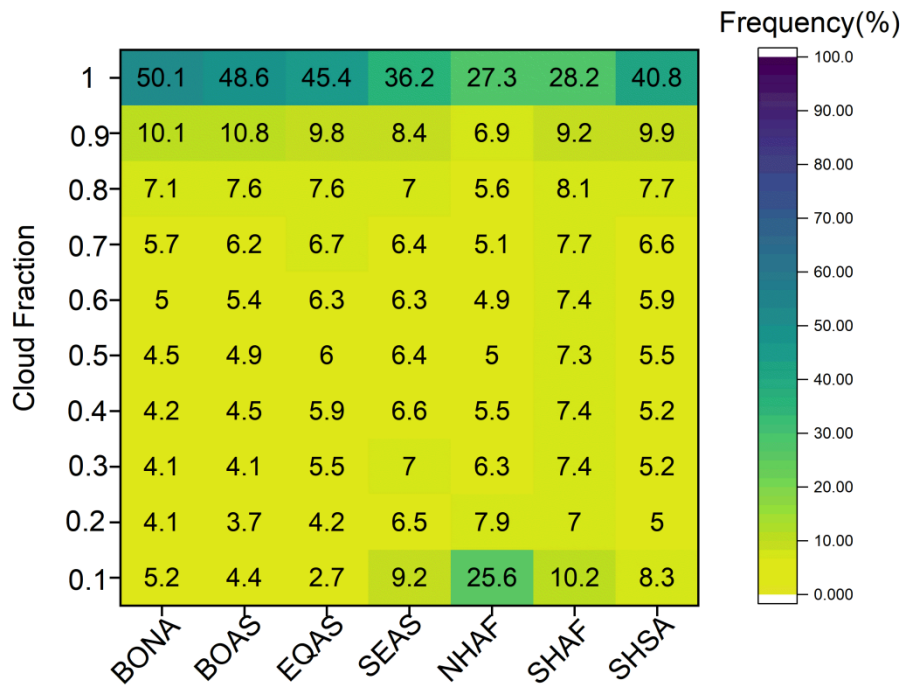

Figure S4. Annual mean frequency of different cloud fractions across seven BB regions from 2013 to 2016.

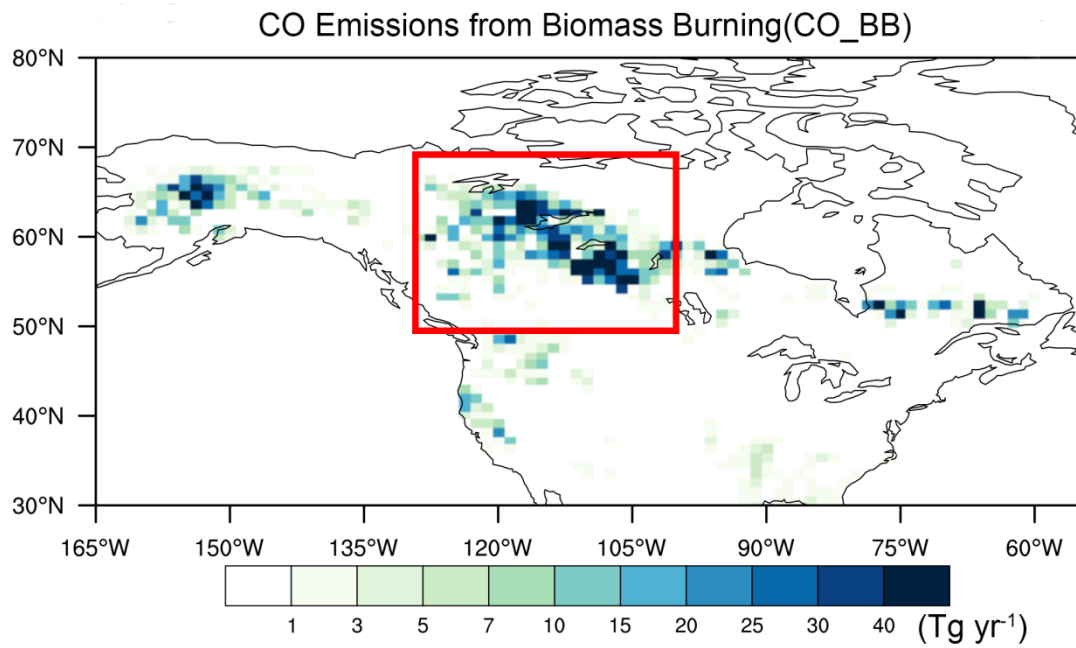

Figure S5. The spatial distribution of CO emissions in BONA, and the region with high BB emissions is marked with red box, namely Alberta and Saskatchewan in Canada within 50°E - 70°E and 100°W-130°W.

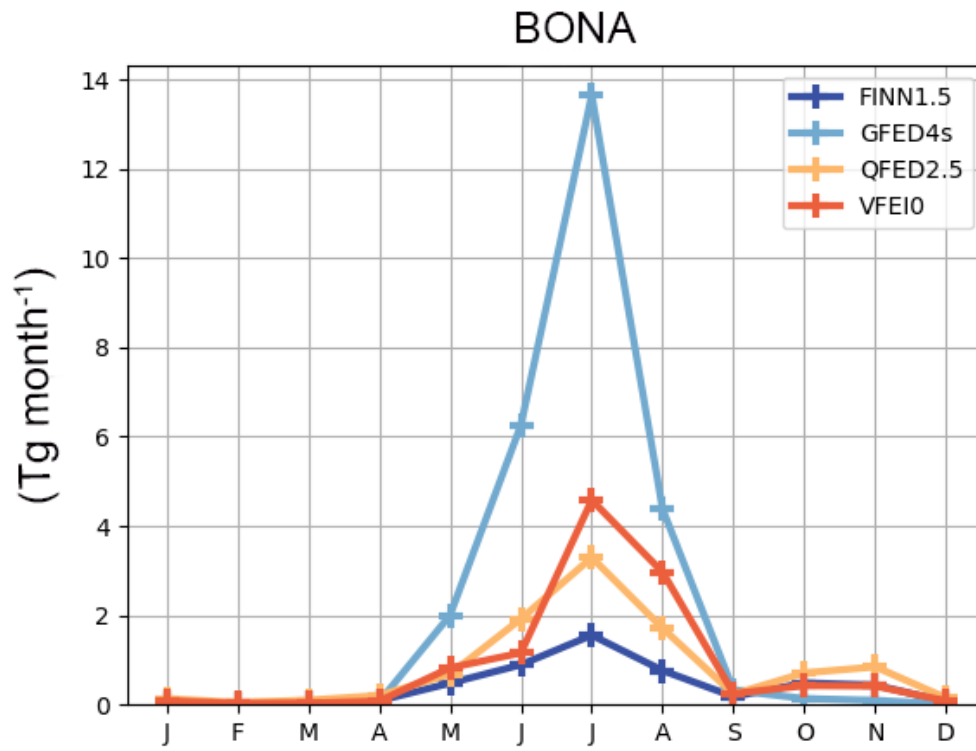

Figure S6. Monthly variation of CO biomass burning emissions in BONA among four BB datasets, mean values from 2013 to 2016 were used.

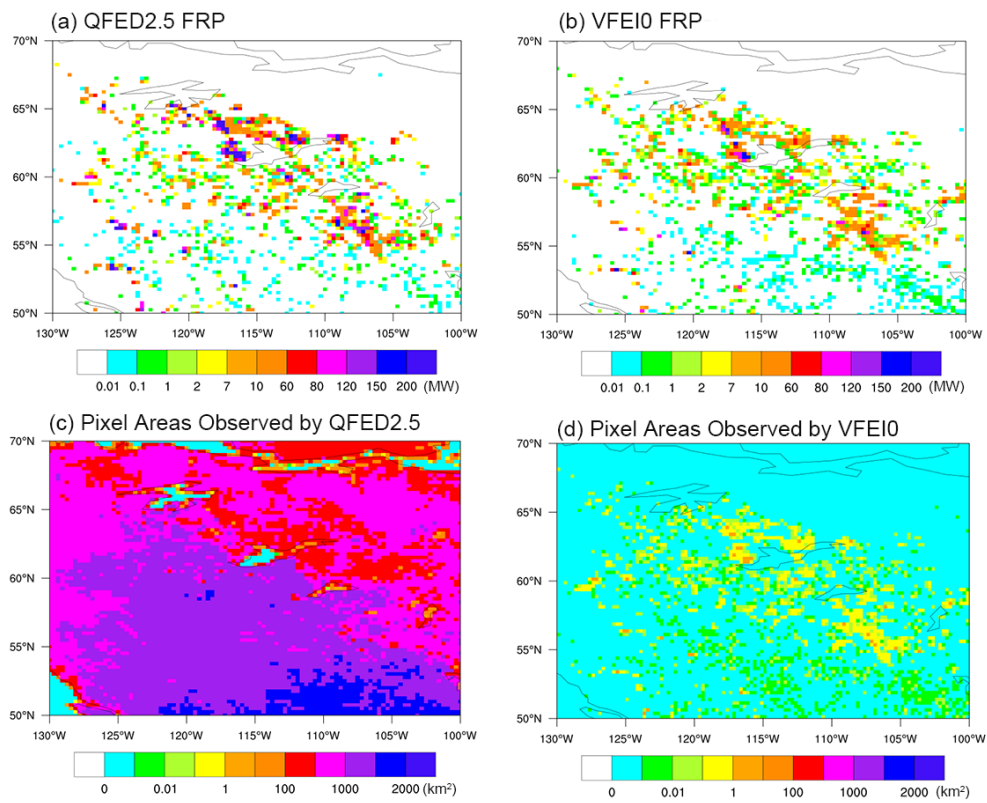

Figure S7. (a-b) Distribution of FRP and (c-d) satellite pixel area of QFED2.5 and VFEI0 in the region shown in Figs. 5 during each July from 2013 to 2016. In this study we use the mean FRP of MOD and MYD for QFED2.5 since the VFEI0 FRP is the average between day and nighttime observations.



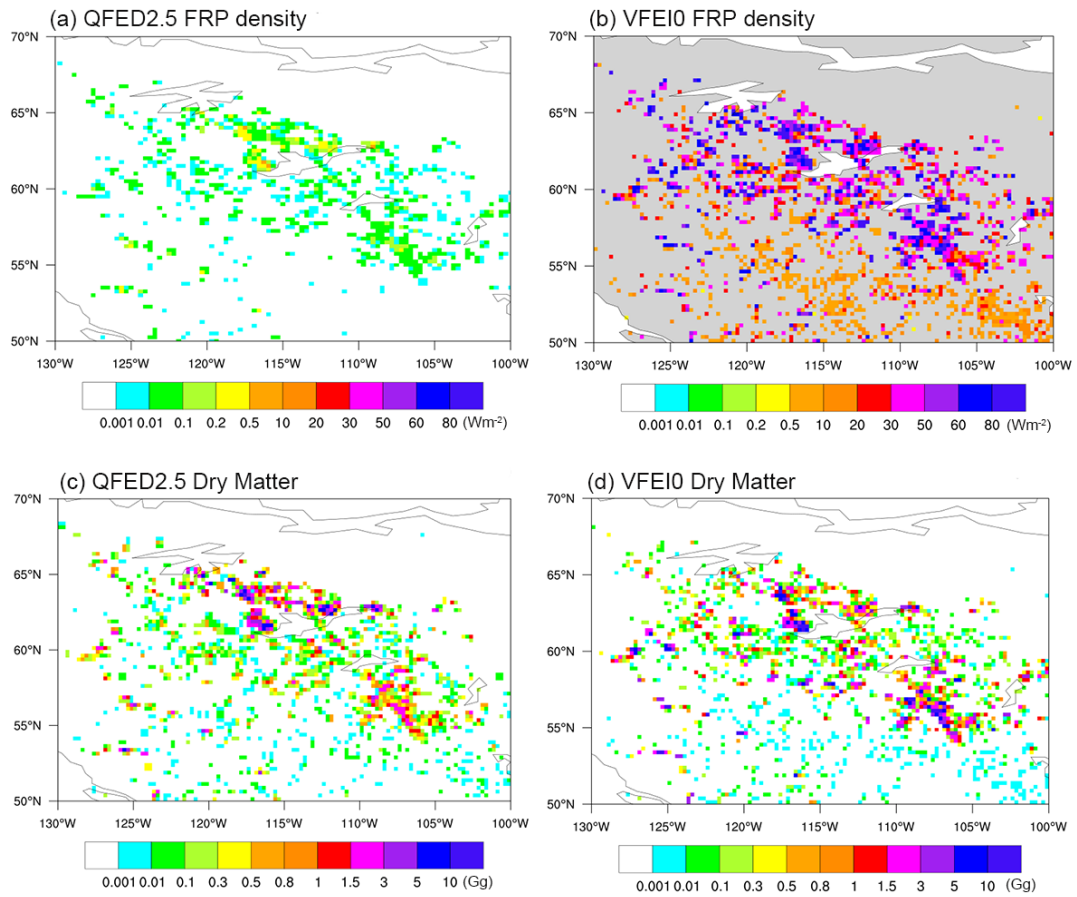

Figure S8. (a-b) Distribution of FRP density and (c-d) final DM in QFED2.5 and VFEI0 in the region shown in Figs. 5 during each July from 2013 to 2016.
